# Supplementary material
Source: publisher figshare collection journal article supplement (https://frontiersin.figshare.com/ndownloader/files/14391806)
Supplement: Supplementary file 1 [file 14391806]

## Sheet: Summary
	Brander 2015 (MPAs, $ Billions)
	Priority	Expand		Mitigate		Preserve
	Expansion Coverage	0.1	0.3	0.1	0.3	0.1	0.3
	Establish (EST)	5.62069	6.30614	5.29589	21.289	6.16061	8.28234
	Operational (OP)	20.5266	25.0643	19.5754	40.1136	21.9597	25.7033
	Opportunity (OC)	20.8799	208.06	22.6726	174.21	21.0908	206.479
	Total Cost (35 Years)	47.0271	239.431	47.5438	235.612	49.2111	240.464
	Ratios
	EST : OP	0.273825	0.251599	0.270538	0.530718	0.280542	0.322229
	EST : OP + OC	0.135744	0.0270505	0.125353	0.0993313	0.143102	0.0356718
	EST + OC : OP	1.29104	8.55268	1.42876	4.87363	1.24097	8.35538
	EST as % of Total	0.11952	0.026338	0.11139	0.0903561	0.125188	0.0344431
	UNDP 2012 (MPAs, $ Billions)
	Average MPA Size (km2)	0.5	5	50	500	5000	50000	300000	Global
	Establish (EST)	0.671079	2.78676	5.428	9.98714	9.9138	2.19156	0.931845	31.9102
	Operational (OP)	57.0566	116.049	110.703	99.7822	48.4975	5.25589	1.43342	438.778
	Opportunity (OC)	0	0	0	0	0	0	0	0
	Total Cost (35 Years)	57.7276	118.835	116.131	109.769	58.4113	7.44745	2.36527	470.688
	Ratios
	EST : OP	0.0117616	0.0240137	0.0490319	0.100089	0.204419	0.416973	0.650084	0.0727252
	EST : OP + OC	0.0117616	0.0240137	0.0490319	0.100089	0.204419	0.416973	0.650084	0.0727252
	EST + OC : OP	0.0117616	0.0240137	0.0490319	0.100089	0.204419	0.416973	0.650084	0.0727252
	EST as % of Total	0.0116249	0.0234506	0.0467402	0.0909829	0.169724	0.29427	0.39397	0.0677948
	(Pascal et al. 2018, $'s/km^2)
	Site	Vanuatu	Saint Martin
	Establish (EST)	59.2359	19.4129
	Operational (OP)	235.486	203.502
	Opportunity (OC)	0	0
	Total Cost (35 Years)	294.722	222.915
	Ratios
	EST : OP	0.251547	0.095394
	EST : OP + OC	0.251547	0.095394
	EST + OC : OP	0.251547	0.095394
	EST as % of Total	0.200989	0.0870865
	Klein et al. 2010 (MPAs, $1,000/km^2)
	Site	B (Min)	G (Max)
	Establish (EST)	0	0
	Operational (OP)	188.889	104.839
	Opportunity (OC)	0.306793	395.935
	Total Cost (35 Years)	189.196	500.774
	Ratios
	EST : OP	0	0
	EST : OP + OC	0	0
	EST + OC : OP	0.0016242	3.77659
	EST as % of Total	N/A	N/A
	Rojas-Nazar, 2015 (MPAs, $ Thousands)
	Site	G (Max)
	Establish (EST)	677.121
	Operational (OP)	4615.28
	Opportunity (OC)	405.802
	Total Cost (35 Years)	5698.2
	Ratios
	EST : OP	0.146713
	EST : OP + OC	0.134856
	EST + OC : OP	0.234639
	EST as % of Total	0.118831
	McCarthy et al. 2012 (TPAs, $ Billions)
	Scenario	High Income	Upper-middle Income	Lower-middle Income	Low Income	Global
	Establish (EST)	202.737	138.658	111.476	44.5118	497.421
	Operational (OP)	64.1235	34.0543	24.2727	6.41235	128.79
	Opportunity (OC)	0	0	0	0	0
	Total Cost (35 Years)	266.86	172.712	135.748	50.9241	626.211
	Ratios
	EST : OP	3.16166	4.07167	4.59263	6.94157	3.86225
	EST : OP + OC	3.16166	4.07167	4.59263	6.94157	3.86225
	EST + OC : OP	3.16166	4.07167	4.59263	6.94157	3.86225
	EST as % of TOTAL	0.759711	0.802826	0.821193	0.87408	0.794334
	James et al. 2001 (TPAs, $ Billions)
	Scenario	Scenario 1	Scenario 2
	Establish (EST)	82.2574	242.018
	Operational (OP)	29.2512	90.4128
	Opportunity (OC)
	Total Cost (35 Years)	111.509	332.431
	Ratios
	EST : OP	2.8121	2.67681
	EST : OP + OC	2.8121	2.67681
	EST + OC : OP	2.8121	2.67681
	EST as % of TOTAL	0.737678	0.728025
	Gantioler et al. 2014 (TPAs, $ Billions (Austria), $/Ha (Slovenia))
	Country	Austria	Slovenia
	Establish (EST)	0.132315	0.19512
	Operational (OP)	0.269706	0.0237784
	Opportunity (OC)	0	0
	Total Cost (35 Years)	0.402021	0.218898
	Ratios
	EST : OP	0.490591	8.20575
	EST : OP + OC	0.490591	8.20575
	EST + OC : OP	0.490591	8.20575
	EST as % of Total	0.329125	0.891372
	Klein et al. 2010 (TPAs, $1,000/km^2)
	Site	P (Min)	F (Max)
	Establish (EST)	0	0
	Operational (OP)	108.607	6.74035
	Opportunity (OC)	141.432	94.2959
	Total Cost (35 Years)	250.039	101.036
	Ratios
	EST : OP	0	0
	EST : OP + OC	0	0
	EST + OC : OP	1.30223	13.9898
	EST as % of Total	0	0
	Frazzee et al. 2003 (TPAs, $ Billions)
	Site	Expanded PA System	Off-reserve System	Total
	Establish (EST)	0.649876	0.0388434	0.688719
	Operational (OP)	0.0877325	0.00822083	0.138474
	Opportunity (OC)	0	0	0
	Total Cost (35 Years)	0.737608	0.0470642	0.827193
	Ratios
	EST : OP	7.40747	4.725	4.97364
	EST : OP + OC	7.40747	4.725	4.97364
	EST + OC : OP	7.40747	4.725	4.97364
	EST as % of Total	0.881058	0.825327	0.832598
	Shaffer et al. 2002 (TPAs, $ Billions)
	Site	G (Max)
	Establish (EST)	290.121
	Operational (OP)	11.3755
	Opportunity (OC)	0
	Total Cost (35 Years)	301.497
	Ratios
	EST : OP	25.504
	EST : OP + OC	25.504
	EST + OC : OP	25.504
	EST as % of Total	0.96227
